# Supplementary material for: Preparation of a ZIF-67-modified magnetic solid phase extraction material and its application in the detection of pyridine ring insecticides
Source: Royal Society of Chemistry journal article supplement (doi:10.1039/d1nj00703c), 2021-01-01
Supplement: d1nj00703c1.pdf [file d1nj00703c1.pdf]

1 **Preparation of ZIF-67-modified magnetic solid phase extraction**  
2 **material and application in the detection of pyridine ring insecticides**

3 *Xiangzhi Feng*<sup>a,b</sup>, *Yuanyuan Li*<sup>a,b\*</sup>, *Yuanyuan Yang*<sup>a,b</sup>, *Yulong Ma*<sup>a,b</sup>,  
4 *Wenxin Ji*<sup>a,b</sup>, *Yonggang Sun*<sup>a,b</sup>, *Tong Chen*<sup>c</sup>, *Yang chen*<sup>d</sup>

5 <sup>a</sup> *State Key Laboratory of High-efficiency Coal Utilization and Green*  
6 *Chemical Engineering*

7 <sup>b</sup> *College of Chemistry and Chemical Engineering, Ningxia University,*  
8 *Yinchuan 750021, China*

9 <sup>c</sup> *Comprehensive Technology Centre, Zhenjiang Customs District P. R. of*  
10 *China, Zhenjiang, 212000, China*

11 <sup>d</sup> *Shanghe New Materials Company, Zhenjiang, 212000, China*

12

13

14

15

16

17

18

19

20

21

22 **Journal: New Journal of Chemistry**

23 **Manuscript ID: NJ-ART-02-2021-000703**

24

---

\* Corresponding author. Tel.: +86 951 2062330; fax: +86 951 2062323.  
*E-mail address:* liyuanyuan\_abc@sohu.com (Y. Li)

## 25 *Preparation of MGO composites*

26 MGO composite was prepared by one-step co-precipitation method.  
27 Briefly, GO (0.3g) was dispersed into deionized water (50mL) with  
28 ultrasonic treatment for 4h to form a uniform dispersion. Next,  
29  $\text{FeCl}_3 \cdot 6\text{H}_2\text{O}$  (4.0g) and  $\text{FeCl}_2 \cdot 4\text{H}_2\text{O}$  (2.5g) were dissolved in deionized  
30 water and added to the above dispersion. Meanwhile, 25mL ammonia  
31 solution was quickly added to the reaction mixture, and 0.75mL oleic acid  
32 was injected into the mixture after stirring for 10minutes. Then, the  
33 reaction mixture was heated with a thermostatic magnetic stirring at 90 °C  
34 for 3h. After that, the product was washed several times with deionized  
35 water and ethanol. MGO was collected by magnetic separation and dried  
36 under vacuum at 70 °C overnight.

37

## 38 *Preparation of poly-dopamine modified MGO*

39 MGO@PDA was synthesized by DA polymerization in Tris-HCl  
40 buffer (pH=8.5) at 25 °C. Briefly, MGO (0.15g) was poured into deionized  
41 water (100mL) with sonicate treatment for 1h to form a homogeneous  
42 solution. Subsequently, DA (0.2g) and Tris (0.05g) were added to the  
43 dispersion, and continuously ultrasonically shaken for 5min. Then, this  
44 mixture was reacted for 24h under mechanical stirring with the speed of  
45 150rpm at room temperature. Next, the obtained product (MGO@PDA)  
46 was separated with external magnetic field, which was successively

47 washed with ultrapure water and ethanol several times. Finally, the  
48 product was dried under vacuum oven 60 °C overnight.

49

## 50 *Representation of different isothermal adsorption equations*

51 Langmuir isotherm model:

$$52 \quad \frac{C_e}{q_e} = \frac{1}{q_{\max}K_L} + \left(\frac{1}{q_{\max}}\right)C_e \quad (1)$$

53 Freundlich isotherm:

$$54 \quad \ln q_e = \ln K_F + \frac{\ln C_e}{n} \quad (2)$$

55 where  $q_e$  ( $\text{mg}\cdot\text{g}^{-1}$ ) is the adsorption capacity,  $C_e$  ( $\mu\text{g}\cdot\text{mL}^{-1}$ ) is the  
56 equilibrium concentration in water,  $q_{\max}$  ( $\text{mg}\cdot\text{g}^{-1}$ ) is the theoretical  
57 saturate adsorption capacity in the Langmuir model, and  $K_L$  ( $\text{mL}\cdot\mu\text{g}^{-1}$ ) is  
58 the Langmuir isotherm constant demonstrating the tendency of adsorption,  
59  $K_F$  is the Freundlich isotherm constant and  $n$  is the heterogeneity factor.

## 60 *Representation of different Kinetic adsorption equations*

61 pseudo-first order model:

$$62 \quad \ln(q_e - q_t) = \ln q_e - k_1 t \quad (3)$$

63 pseudo-second order kinetic model:

$$64 \quad \frac{t}{q_t} = \frac{1}{k_2 q_e^2} + \frac{t}{q_e} \quad (4)$$

65

66 Where  $q_e$  and  $q_t$  ( $\text{mg g}^{-1}$ ) are the amounts of the analyte onto the  
67 adsorbents at equilibrium and time  $t$  (min).  $k_1$  ( $\text{min}^{-1}$ ) is the rate  
68 constant in the pseudo-first order adsorption model.  $k_2$  ( $\text{g}/(\text{mg min})$ ) is  
69 the rate constant in the pseudo-second order adsorption model.

70

71 **Table S1: The peak areas of praziquantel and pymetrozine at the concentration**  
72 **of 0.1-100  $\mu\text{g}\cdot\text{mL}^{-1}$**

| <b>Concentration</b>                         | <b>Peak area (praziquantel)</b> | <b>Peak area (pymetrozine)</b> |
|----------------------------------------------|---------------------------------|--------------------------------|
| <b>0.1<math>\mu\text{g}/\text{mL}</math></b> | <b>10019.7</b>                  | <b>92485.7</b>                 |
| <b>1<math>\mu\text{g}/\text{mL}</math></b>   | <b>100387.7</b>                 | <b>100321.6</b>                |
| <b>5<math>\mu\text{g}/\text{mL}</math></b>   | <b>478702.9</b>                 | <b>496154.8</b>                |
| <b>10<math>\mu\text{g}/\text{mL}</math></b>  | <b>971128.5</b>                 | <b>967214.9</b>                |
| <b>15<math>\mu\text{g}/\text{mL}</math></b>  | <b>1467116.6</b>                | <b>1425064.2</b>               |
| <b>20<math>\mu\text{g}/\text{mL}</math></b>  | <b>1970804.1</b>                | <b>1947788.8</b>               |
| <b>30<math>\mu\text{g}/\text{mL}</math></b>  | <b>2911799.7</b>                | <b>2912494.2</b>               |
| <b>40<math>\mu\text{g}/\text{mL}</math></b>  | <b>3900563.8</b>                | <b>3881115.4</b>               |
| <b>50<math>\mu\text{g}/\text{mL}</math></b>  | <b>4734553.8</b>                | <b>4846367.3</b>               |
| <b>60<math>\mu\text{g}/\text{mL}</math></b>  | <b>5664812.0</b>                | <b>5813337.9</b>               |
| <b>100<math>\mu\text{g}/\text{mL}</math></b> | <b>9350021.9</b>                | <b>9567641</b>                 |

73

74

75

76 As shown in Fig.S1, matrix-matched calibration curves for the  
 77 relationship between concentrations of analytes and their peak areas were  
 78 calculated by using weighted least-squares regression.  
 79

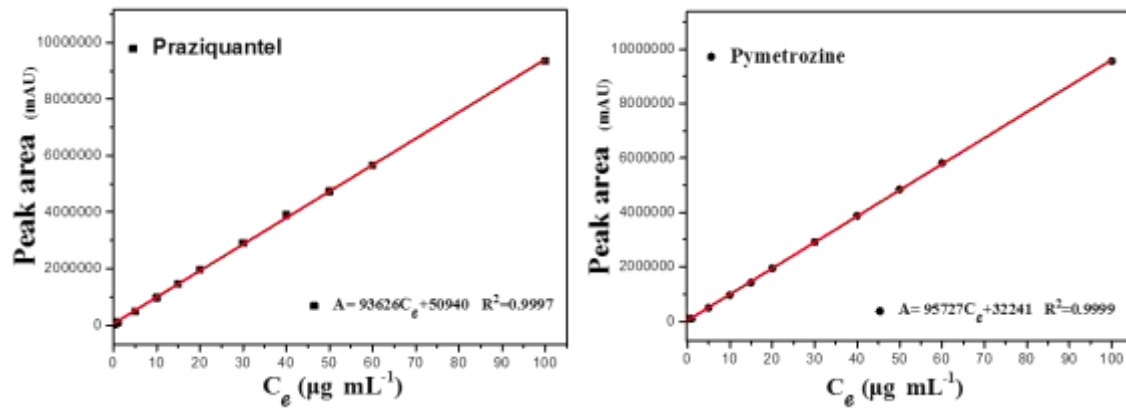

80

81 Fig.S1: The standrd curves of praziquantel and pymetrozine at the concentration  
 82 of 0.1-100  $\mu\text{g}\cdot\text{mL}^{-1}$

83

84 Table S2: Analytical performance of the present method

| Analytes     | Linear range                  | Regression equation | $R^2$  | LOD                     | LOQ                     |
|--------------|-------------------------------|---------------------|--------|-------------------------|-------------------------|
| praziquantel | 0.1-100 $\mu\text{g mL}^{-1}$ | $A=93626C_e+50940$  | 0.9997 | 0.21ng $\text{mL}^{-1}$ | 0.69ng $\text{mL}^{-1}$ |
| pymetrozine  | 0.1-100 $\mu\text{g mL}^{-1}$ | $A=95727C_e+32241$  | 0.9999 | 0.08ng $\text{mL}^{-1}$ | 0.26ng $\text{mL}^{-1}$ |

85

86

87

88 **Table S3: Specification of praziquantel and pymetrozine**

| <b>Contaminants</b>             | <b>praziquantel</b>                                                                | <b>pymetrozine</b>                                                                  |
|---------------------------------|------------------------------------------------------------------------------------|-------------------------------------------------------------------------------------|
| <b>Structure</b>                | 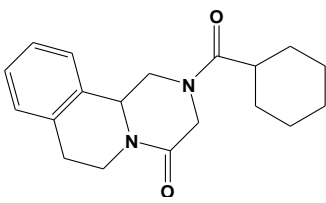 |  |
| <b>Molecular weight (g/mol)</b> | 312.41                                                                             | 217.23                                                                              |
| <b>Molecular formula</b>        | C <sub>19</sub> H <sub>24</sub> N <sub>2</sub> O <sub>2</sub>                      | C <sub>10</sub> H <sub>11</sub> N <sub>5</sub> O                                    |
| <b>pKa</b>                      | -0.98 ± 0.20                                                                       | 12.90 ± 0.40                                                                        |
| <b>CAS</b>                      | 55268-74-1                                                                         | 123312-89-0                                                                         |
| <b>Melting point ( °C)</b>      | 136-138                                                                            | 217                                                                                 |
| <b>Physical properties</b>      | White crystal powder                                                               | White crystal powder                                                                |

89

90

91

92

93

94

95

96 **Table S4: The surface atomic ration of main elements in different materials**

| Items           | elements | GO    | MGO   | MGO@PDA | MGO@PDA@ZIF-67 |
|-----------------|----------|-------|-------|---------|----------------|
|                 | C1s      | 62.93 | 36.34 | 65.73   | 46.32          |
| <b>Surface</b>  | N1s      | 0.30  | 0.02  | 8.96    | 15.13          |
| <b>atomic</b>   | O1s      | 36.77 | 40.27 | 21.08   | 31.27          |
| <b>ratio(%)</b> | Fe2p     | 0.00  | 23.36 | 4.23    | 3.14           |
|                 | Co2p     | 0.00  | 0.01  | 0.00    | 4.14           |

97

98 **Table S5 Two isotherm adsorption models parameters onto**

99 **MGO@PDA@ZIF-67 m-SPE material.**

| Contaminant         | Langmuir model                     |                                |               | Freundlich model                                             |               |               |
|---------------------|------------------------------------|--------------------------------|---------------|--------------------------------------------------------------|---------------|---------------|
|                     | $q_{max}$<br>(mg g <sup>-1</sup> ) | $K_L$<br>(L mg <sup>-1</sup> ) | $R^2$         | $K_F$<br>(mg <sup>1-n</sup> L <sup>n</sup> g <sup>-1</sup> ) | $1/n$         | $R^2$         |
| <b>Praziquantel</b> | <b>22.68</b>                       | <b>7.113</b>                   | <b>0.9999</b> | <b>19.52</b>                                                 | <b>0.0614</b> | <b>0.8595</b> |
| <b>Pymetrozine</b>  | <b>24.27</b>                       | <b>8.240</b>                   | <b>0.9998</b> | <b>18.86</b>                                                 | <b>0.0509</b> | <b>0.8632</b> |

100

101

102

103

104 **Table S6 Two Kinetic parameters for the adsorption onto MGO@PDA@ZIF-67**

105 **m-SPE material.**

| Contaminant  | Pseudo-first order                |                               |        | Pseudo-second order               |                       |        |
|--------------|-----------------------------------|-------------------------------|--------|-----------------------------------|-----------------------|--------|
|              | $q_{e1}$<br>(mg g <sup>-1</sup> ) | $K_1$<br>(min <sup>-1</sup> ) | $R^2$  | $q_{e2}$<br>(mg g <sup>-1</sup> ) | $K_2$<br>(g/(mg min)) | $R^2$  |
| Praziquantel | 18.84                             | 0.0296                        | 0.9654 | 24.39                             | 0.00248               | 0.9998 |
| Pymetrozine  | 22.95                             | 0.0324                        | 0.8187 | 26.81                             | 0.00237               | 0.9997 |

106

107 **Table S7: Comparison between the developed method and other previously**

108 **m-SPE-HPLC methods for the extraction and determination of insecticides**

| Adsorbent                                                           | Analysis Method | Dosage of sorbent | Linear range                      | Recovery (%) | Ref.      |
|---------------------------------------------------------------------|-----------------|-------------------|-----------------------------------|--------------|-----------|
| Fe <sub>3</sub> O <sub>4</sub> @SiO <sub>2</sub> @KIT-6             | m-SPE-HPLC-UV   | 40mg              | 0.02-1200<br>ng mL <sup>-1</sup>  | 86.6-98.8    | [41]      |
| Fe <sub>3</sub> O <sub>4</sub> @COF-(NO <sub>2</sub> ) <sub>2</sub> | m-SPE-HPLC-UV   | 10mg              | 0.1-30<br>ng mL <sup>-1</sup>     | 77.5-110.2   | [42]      |
| MGO/MIL                                                             | m-SPE-HPLC-DAD  | 20mg              | 0.064-3500<br>ng mL <sup>-1</sup> | 82.13-102.27 | [43]      |
| Fe <sub>3</sub> O <sub>4</sub> @SiO <sub>2</sub> -GO-MOF            | m-SPE-HPLC-UV   | 10mg              | 0.02-1<br>μg·mL <sup>-1</sup>     | 81.2-113.1   | [44]      |
| MGO@PDA@ZIF-67                                                      | m-SPE-HPLC-UV   | 5mg               | 0.10-100<br>μg·mL <sup>-1</sup>   | 92.30-102.8  | This work |

109

110

111



## References

112

113

114 41 M. Zhang, J. Yang, X. Geng, Y. Li, Z. Zha, S. Cui and J. Yang, *J. Chromatogr. A*, 2019, **1598**,  
115 20-29.

116 42 J. Lu, R. Wang, J. Luan, Y. Li, X. He, L. Chen and Y. Zhang, *J. Chromatogr. A*, 2020, **1618**,  
117 460898.

118 43 A. Ghiasi, A. Malekpour and S. Mahpishanian, *Talanta*, 2020, **217**, 121120.

119 44 X. Wang, X. Ma, P. Huang, J. Wang, T. Du, X. Du and X. Lu, *Talanta*, 2018, **181**, 112-117.

120
