# Supplementary material for: Preparation of a ZIF-67-modified magnetic solid phase extraction material and its application in the detection of pyridine ring insecticides
Source: Royal Society of Chemistry journal article supplement (doi:10.1039/d1nj00703c), 2021-01-01
Supplement: d1nj00703c2.pdf [file d1nj00703c2.pdf]

**Preparation of ZIF-67-modified magnetic solid phase extraction material and application in the detection of pyridine ring insecticides**

*Xiangzhi Feng*<sup>a,b</sup>, *Yuanyuan Li*<sup>a,b\*</sup>, *Yuanyuan Yang*<sup>a,b</sup>, *Yulong Ma*<sup>a,b</sup>,  
*Wenxin Ji*<sup>a,b</sup>, *Yonggang Sun*<sup>a,b</sup>, *Tong Chen*<sup>c</sup>, *Yang chen*<sup>d</sup>

<sup>a</sup> *State Key Laboratory of High-efficiency Coal Utilization and Green Chemical Engineering*

<sup>b</sup> *College of Chemistry and Chemical Engineering, Ningxia University, Yinchuan 750021, China*

<sup>c</sup> *Comprehensive Technology Centre, Zhenjiang Customs District P. R. of China, Zhenjiang, 212000, China*

<sup>d</sup> *Shanghe New Materials Company, Zhenjiang, 212000, China*

**Journal: New Journal of Chemistry**

**Manuscript ID: NJ-ART-02-2021-000703**

---

\* Corresponding author. Tel.: +86 951 2062330; fax: +86 951 2062323.  
E-mail address: liyuanyuan\_abc@sohu.com (Y. Li)

### *Preparation of MGO composites*

MGO composite was prepared by one-step co-precipitation method. Briefly, GO (0.3g) was dispersed into deionized water (50mL) with ultrasonic treatment for 4h to form a uniform dispersion. Next,  $\text{FeCl}_3 \cdot 6\text{H}_2\text{O}$  (4.0g) and  $\text{FeCl}_2 \cdot 4\text{H}_2\text{O}$  (2.5g) were dissolved in deionized water and added to the above dispersion. Meanwhile, 25mL ammonia solution was quickly added to the reaction mixture, and 0.75mL oleic acid was injected into the mixture after stirring for 10minutes. Then, the reaction mixture was heated with a thermostatic magnetic stirring at  $90^\circ\text{C}$  for 3h. After that, the product was washed several times with deionized water and ethanol. MGO was collected by magnetic separation and dried under vacuum at  $70^\circ\text{C}$  overnight.

### *Preparation of poly-dopamine modified MGO*

MGO@PDA was synthesized by DA polymerization in Tris-HCl buffer (pH=8.5) at  $25^\circ\text{C}$ . Briefly, MGO (0.15g) was poured into deionized water (100mL) with sonicate treatment for 1h to form a homogeneous solution. Subsequently, DA (0.2g) and Tris (0.05g) were added to the dispersion, and continuous ultrasonically shaken for 5min. Then, this mixture was reacted for 24h under mechanically stirring with the speed of 150rpm at room temperature. Next, the obtained product (MGO@PDA) was separated with external magnetic field, which was

successively washed with ultrapure water and ethanol several times. Finally, the product was dried under vacuum oven 60°C overnight.

### *Representation of different isothermal adsorption equations*

Langmuir isotherm model:

$$\frac{C_e}{q_e} = \frac{1}{q_{max}K_L} + \left(\frac{1}{q_{max}}\right)C_e \quad (1)$$

Freundlich isotherm:

$$\ln q_e = \ln K_F + \frac{\ln C_e}{n} \quad (2)$$

where  $q_e$  ( $\text{mg}\cdot\text{g}^{-1}$ ) is the adsorption capacity,  $C_e$  ( $\mu\text{g}\cdot\text{mL}^{-1}$ ) is the equilibrium concentration in water,  $q_{max}$  ( $\text{mg}\cdot\text{g}^{-1}$ ) is the theoretical saturate adsorption capacity in the Langmuir model, and  $K_L$  ( $\text{mL}\cdot\mu\text{g}^{-1}$ ) is the Langmuir isotherm constant demonstrating the tendency of adsorption,  $K_F$  is the Freundlich isotherm constant and  $n$  is the heterogeneity factor.

### *Representation of different Kinetic adsorption equations*

pseudo-first order model:

$$\ln(q_e - q_t) = \ln q_e - k_1 t \quad (3)$$

pseudo-second order kinetic model:

$$\frac{t}{q_t} = \frac{1}{k_2 q_e^2} + \frac{t}{q_e} \quad (4)$$

Where  $q_e$  and  $q_t$  ( $\text{mg}\cdot\text{g}^{-1}$ ) are the amounts of the analyte onto the adsorbents at equilibrium and time  $t$  (min).  $k_1$  ( $\text{min}^{-1}$ ) is the rate constant in the pseudo-first order adsorption model.  $k_2$  ( $\text{g}/(\text{mg}\cdot\text{min})$ ) is the rate constant in the pseudo-second order adsorption model.

**Table S1: The peak areas of praziquantel and pymetrozine at the concentration of 0.1-100  $\mu\text{g}\cdot\text{mL}^{-1}$**

| Concentration               | Peak area (praziquantel) | Peak area (pymetrozine) |
|-----------------------------|--------------------------|-------------------------|
| 0.1 $\mu\text{g}/\text{mL}$ | 10019.7                  | 92485.7                 |
| 1 $\mu\text{g}/\text{mL}$   | 100387.7                 | 100321.6                |
| 5 $\mu\text{g}/\text{mL}$   | 478702.9                 | 496154.8                |
| 10 $\mu\text{g}/\text{mL}$  | 971128.5                 | 967214.9                |
| 15 $\mu\text{g}/\text{mL}$  | 1467116.6                | 1425064.2               |
| 20 $\mu\text{g}/\text{mL}$  | 1970804.1                | 1947788.8               |
| 30 $\mu\text{g}/\text{mL}$  | 2911799.7                | 2912494.2               |
| 40 $\mu\text{g}/\text{mL}$  | 3900563.8                | 3881115.4               |
| 50 $\mu\text{g}/\text{mL}$  | 4734553.8                | 4846367.3               |
| 60 $\mu\text{g}/\text{mL}$  | 5664812.0                | 5813337.9               |

|                      |           |         |
|----------------------|-----------|---------|
| 100 $\mu\text{g/mL}$ | 9350021.9 | 9567641 |
|----------------------|-----------|---------|

As shown in Fig.S1, matrix-matched calibration curves for the relationship between concentrations of analytes and their peak areas were calculated by using weighted least-squares regression.

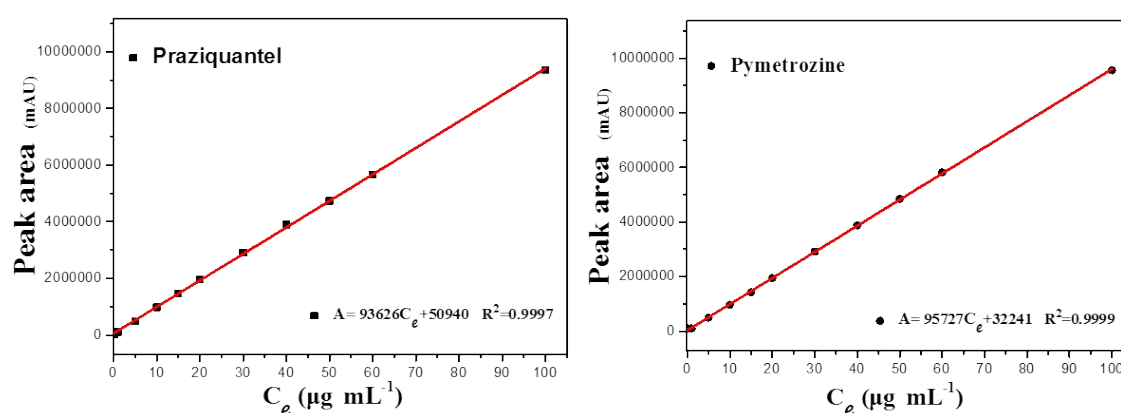

**Fig.S1:** The standrd curves of praziquantel and pymetrozine at the concentration of 0.1-100  $\mu\text{g}\cdot\text{mL}^{-1}$

**Table S2:** Analytical performance of the present method

| Analytes     | Linear range                             | Regression equation | $R^2$  | LOD                                 | LOQ                                 |
|--------------|------------------------------------------|---------------------|--------|-------------------------------------|-------------------------------------|
| praziquantel | 0.1-100 $\mu\text{g}\cdot\text{mL}^{-1}$ | $A=93626C_e+50940$  | 0.9997 | 0.21 $\text{ng}\cdot\text{mL}^{-1}$ | 0.69 $\text{ng}\cdot\text{mL}^{-1}$ |
| pymetrozine  | 0.1-100 $\mu\text{g}\cdot\text{mL}^{-1}$ | $A=95727C_e+32241$  | 0.9999 | 0.08 $\text{ng}\cdot\text{mL}^{-1}$ | 0.26 $\text{ng}\cdot\text{mL}^{-1}$ |

**Table S3: Specification of praziquantel and pymetrozine**

| Contaminants             | praziquantel                                                                       | pymetrozine                                                                         |
|--------------------------|------------------------------------------------------------------------------------|-------------------------------------------------------------------------------------|
| Structure                | 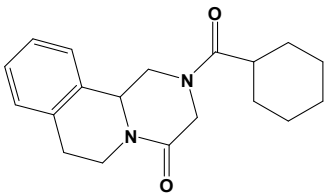 |  |
| Molecular weight (g/mol) | 312.41                                                                             | 217.23                                                                              |
| Molecular formula        | C <sub>19</sub> H <sub>24</sub> N <sub>2</sub> O <sub>2</sub>                      | C <sub>10</sub> H <sub>11</sub> N <sub>5</sub> O                                    |
| pKa                      | -0.98 ± 0.20                                                                       | 12.90 ± 0.40                                                                        |
| CAS                      | 55268-74-1                                                                         | 123312-89-0                                                                         |
| Melting point (°C)       | 136-138                                                                            | 217                                                                                 |
| Physical properties      | White crystal powder                                                               | White crystal powder                                                                |

**Table S4: The surface atomic ration of main elements in different materials**

| Items    | elements | GO    | MGO   | MGO@PDA | MGO@PDA@ZIF-67 |
|----------|----------|-------|-------|---------|----------------|
|          | C1s      | 62.93 | 36.34 | 65.73   | 46.32          |
| Surface  | N1s      | 0.30  | 0.02  | 8.96    | 15.13          |
| atomic   | O1s      | 36.77 | 40.27 | 21.08   | 31.27          |
| ratio(%) | Fe2p     | 0.00  | 23.36 | 4.23    | 3.14           |
|          | Co2p     | 0.00  | 0.01  | 0.00    | 4.14           |

**Table S5 Two isotherm adsorption models parameters onto MGO@PDA@ZIF-67 m-SPE material.**

| Contaminant  | Langmuir model                                 |                                            |        | Freundlich model                                                |        |        |
|--------------|------------------------------------------------|--------------------------------------------|--------|-----------------------------------------------------------------|--------|--------|
|              | $q_{max}$<br>( $\text{mg}\cdot\text{g}^{-1}$ ) | $K_L$<br>( $\text{L}\cdot\text{mg}^{-1}$ ) | $R^2$  | $K_F$<br>( $\text{mg}^{1-n}\cdot\text{L}^n\cdot\text{g}^{-1}$ ) | $1/n$  | $R^2$  |
| Praziquantel | 22.68                                          | 7.113                                      | 0.9999 | 19.52                                                           | 0.0614 | 0.8595 |
| Pymetrozine  | 24.27                                          | 8.240                                      | 0.9998 | 18.86                                                           | 0.0509 | 0.8632 |

**Table S6 Two Kinetic parameters for the adsorption onto MGO@PDA@ZIF-67****m-SPE material.**

| Contaminant  | Pseudo-first order                            |                                |        | Pseudo-second order                           |                                                    |        |
|--------------|-----------------------------------------------|--------------------------------|--------|-----------------------------------------------|----------------------------------------------------|--------|
|              | $q_{e1}$<br>( $\text{mg}\cdot\text{g}^{-1}$ ) | $K_1$<br>( $\text{min}^{-1}$ ) | $R^2$  | $q_{e2}$<br>( $\text{mg}\cdot\text{g}^{-1}$ ) | $K_2$<br>( $\text{g}/(\text{mg}\cdot\text{min})$ ) | $R^2$  |
| Praziquantel | 18.84                                         | 0.0296                         | 0.9654 | 24.39                                         | 0.00248                                            | 0.9998 |
| Pymetrozine  | 22.95                                         | 0.0324                         | 0.8187 | 26.81                                         | 0.00237                                            | 0.9997 |

**Table S7: Comparison between the developed method and other previously m-SPE-HPLC methods for the extraction and determination of insecticides**

| Adsorbent                                          | Analysis Method | Dosage of sorbent | Linear range                                 | Recovery (%) | Ref. |
|----------------------------------------------------|-----------------|-------------------|----------------------------------------------|--------------|------|
| $\text{Fe}_3\text{O}_4@\text{SiO}_2@\text{KIT-6}$  | m-SPE-HPLC-UV   | 40mg              | 0.02-1200<br>$\text{ng}\cdot\text{mL}^{-1}$  | 86.6-98.8    | [41] |
| $\text{Fe}_3\text{O}_4@\text{COF}-(\text{NO}_2)_2$ | m-SPE-HPLC-UV   | 10mg              | 0.1-30<br>$\text{ng}\cdot\text{mL}^{-1}$     | 77.5-110.2   | [42] |
| MGO/MIL                                            | m-SPE-HPLC-DAD  | 20mg              | 0.064-3500<br>$\text{ng}\cdot\text{mL}^{-1}$ | 82.13-102.27 | [43] |
| $\text{Fe}_3\text{O}_4@\text{SiO}_2\text{-GO-MOF}$ | m-SPE-HPLC-UV   | 10mg              | 0.02-1<br>$\mu\text{g}\cdot\text{mL}^{-1}$   | 81.2-113.1   | [44] |
| MGO@PDA@ZIF-67                                     | m-SPE-HPLC-UV   | 5mg               | 0.10-100                                     | 92.30-102.8  | This |



## References

- 41 M. Zhang, J. Yang, X. Geng, Y. Li, Z. Zha, S. Cui and J. Yang, *J. Chromatogr. A*, 2019, **1598**, 20-29.
- 42 J. Lu, R. Wang, J. Luan, Y. Li, X. He, L. Chen and Y. Zhang, *J. Chromatogr. A*, 2020, **1618**, 460898.
- 43 A. Ghiasi, A. Malekpour and S. Mahpishanian, *Talanta*, 2020, **217**, 121120.
- 44 X. Wang, X. Ma, P. Huang, J. Wang, T. Du, X. Du and X. Lu, *Talanta*, 2018, **181**, 112-117.
